# Supplementary material for: Comparison of CO 2 and O 2 fluxes demonstrate retention of respired CO 2 in tree stems from a range of tree species
Source: Copernicus journal article supplement (doi:10.5194/bg-16-177-2019), 2019-01-17
Supplement: Supplementary file 1 [file bg-16-177-2019-supplement.zip]

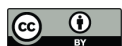

## *Supplement of*

# **Comparison of CO<sub>2</sub> and O<sub>2</sub> fluxes demonstrate retention of respired CO<sub>2</sub> in tree stems from a range of tree species**

**Boaz Hilman et al.**

*Correspondence to:* Boaz Hilman (boaz.hilman@gmail.com)

- [bg-16-177-2019-supplement-title-page.pdf](#)
- [Supplement.docx](#)

The copyright of individual parts of the supplement might differ from the CC BY 4.0 License.
